# Supplementary material for: Understanding the Mental Health of Doctoral Students
Source: MDPI journal article supplement (doi:10.3390/encyclopedia3040109), 2023-12-15
Supplement: s1 [file s1]

Archive with 1 entries (1 files):
- encyclopedia-2720462-supplementary.pdf
